# Supplementary material
Source: Research Square preprint supplement (doi:10.21203/rs.3.rs-9043305/v1)
Supplement: Supplementary file 1 [file ccc8d484036559ba29333da5.docx]

# Additional File 1

## Regression analyses

Regression analyses were conducted to test the predictive effects of study approaches and AI usage on academic procrastination and academic self-esteem. This preliminary step is considered essential for testing mediation, as mediation analysis builds on sequential regression models (Hair et al., 2021; Koirala, 2025). All assumptions of linearity, homoscedasticity, independence, and multicollinearity were met (Field, 2017; Osbourne & Waters, 2002; Cook, 1977). VIF values were below 2.0, and Cook’s Distance < 1.0.

### Procrastination (DV): Deep Study and AI Usage

### Table 1.1

| *Model Fit Measures for Procrastination and Deep Study Approach, AI Usage* | | | | | | |
| --- | --- | --- | --- | --- | --- | --- |
|  | | | **Overall Model Test** | | | |
| **Model** | **R** | **R²** | **F** | **df1** | **df2** | **p** |
| **1** | **0.24** | **0.06** | **12.6** | **2** | **399** | **<.001** |
| *Note.* Models estimated using sample size of N=402 | | | | | | |

### Table 1.2

| *Model Coefficients - Procrastination* | | | | | | |
| --- | --- | --- | --- | --- | --- | --- |
|  | | | **95% Confidence Interval** | |  | |
| **Predictor** | **Estimate** | **SE** | **Lower** | **Upper** | **t** | **p** |
| **Intercept** | **27.74** | **3.16** | **21.53** | **33.95** | **8.78** | **<.001** |
| **Deep Study** | **-0.12** | **0.06** | **-0.24** | **0.01** | **-1.89** | **0.060** |
| **AI Usage** | **0.14** | **0.03** | **0.08** | **0.20** | **4.64** | **<.001** |

A multiple regression analysis was conducted using the Deep Study Approach and Academic AI Usage as predictors of Academic Procrastination (Tables 1.1 and 1.2). The model was statistically significant, F(2, 399) = 12.60, p < .001, and explained 6% of the variance in procrastination (R² = .06), representing a small-to-moderate effect size (Cohen, 1988).

Within this model, AI Usage significantly predicted higher procrastination (B = 0.14, p < .001), whereas the Deep Study approach showed a nonsignificant negative trend (B = -0.12, p = .060). This indicates that the overall significance of the model was driven by AI usage, rather than by deep study.

### Procrastination (DV): Surface Study and AI Usage

### Table 1.3

| *Model Fit Measures for Procrastination and Surface Study Approach, AI Usage* | | | | | | |
| --- | --- | --- | --- | --- | --- | --- |
|  | | | **Overall Model Test** | | | |
| **Model** | **R** | **R²** | **F** | **df1** | **df2** | **p** |
| **2** | **0.27** | **0.07** | **15.6** | **2** | **399** | **<.001** |
| *Note.* Models estimated using sample size of N=402 | | | | | | |

### Table 1.4

| *Model Coefficients - Procrastination* | | | | | | |
| --- | --- | --- | --- | --- | --- | --- |
|  | | | **95% Confidence Interval** | |  | |
| **Predictor** | **Estimate** | **SE** | **Lower** | **Upper** | **t** | **p** |
| **Intercept** | **22.52** | **2.50** | **17.61** | **27.42** | **9.03** | **<.001** |
| **Surface Study** | **0.19** | **0.06** | **0.07** | **0.31** | **3.05** | **0.002** |
| **AI Usage** | **0.11** | **0.03** | **0.04** | **0.17** | **3.17** | **0.002** |

A multiple regression analysis was conducted using the Surface Study Approach and Academic AI Usage as predictors of Academic Procrastination (Tables 1.3 and 1.4). The model was statistically significant, F(2, 399) = 15.60, p < .001, and explained 7.2% of the variance in procrastination (R² = .07), representing a moderate effect size (Cohen, 1988). Both surface study approach (B = 0.19, *p* = .002) and AI usage (B = 0.11, *p* = .002) emerged as significant positive predictors. It indicates that higher reliance on surface strategies and greater AI use were associated with increased procrastination.

Controlling for AI usage, each one-point increase in surface study scores was associated with a 0.19-point increase in procrastination scores. Similarly, holding surface study constant, each additional point in AI usage scores corresponded to a 0.11-point increase in procrastination.

### Self-Esteem (DV): Deep Study and AI Usage

### Table 1.5

| *Model Fit Measures for Self-Esteem and Deep Study Approach, AI Usage* | | | | | | |
| --- | --- | --- | --- | --- | --- | --- |
|  | | | **Overall Model Test** | | | |
| **Model** | **R** | **R²** | **F** | **df1** | **df2** | **p** |
| **3** | **0.39** | **0.15** | **35.2** | **2** | **399** | **<.001** |
| *Note.*Models estimated using sample size of N=402 | | | | | | |

### Table 1.6

| *Model Coefficients - Self-esteem* | | | | |
| --- | --- | --- | --- | --- |
| **Predictor** | **Estimate** | **SE** | **t** | **p** |
| **Intercept** | **15.95** | **2.00** | **7.96** | **<.001** |
| **Deep Study** | **0.32** | **0.04** | **8.19** | **<.001** |
| **AI Usage** | **0.03** | **0.02** | **1.78** | **0.076** |

For Academic Self-Esteem, a multiple regression with Deep Study Approach and AI Usage as predictors (Tables 1.5 and 1.6) yielded a significant model, F(2, 399) = 35.20, p < .001, explaining 15% of the variance (R² = .15), a large effect size (Cohen, 1988; Lakens, 2013). The deep approach significantly predicted higher self-esteem (B = 0.32, p < .001), while AI usage was not a significant predictor (B = 0.03, p = .076). Thus, a deeper approach to study predicted greater self-esteem, even when accounting for AI usage.

### Self-Esteem (DV): Surface Study and AI Usage

### Table 1.7

| *Model Fit Measures for Self-Esteem and Surface Study Approach, AI Usage* | | | | | | |
| --- | --- | --- | --- | --- | --- | --- |
|  | | | **Overall Model Test** | | | |
| **Model** | **R** | **R²** | **F** | **df1** | **df2** | **p** |
| **4** | **0.16** | **0.03** | **5.51** | **2** | **399** | **0.004** |
| *Note.* Models estimated using sample size of N=402 | | | | | | |

### Table 1.8

| *Model Coefficients - Self-esteem* | | | | |
| --- | --- | --- | --- | --- |
| **Predictor** | **Estimate** | **SE** | **t** | **p** |
| **Intercept** | **27.18** | **1.70** | **15.95** | **<.001** |
| **Surface Study** | **-0.12** | **0.04** | **-2.87** | **0.004** |
| **AI Usage** | **0.06** | **0.02** | **2.63** | **0.009** |

A multiple regression analysis was conducted using the Surface Study Approach and Academic AI Usage as predictors of Academic Self-Esteem (Tables 1.7 and 1.8). The model was statistically significant, F(2, 399) = 5.51, p < .001, though it explained only 3% of the variance (R² = .03). Surface study negatively predicted self-esteem (B = -0.12, p = .004), whereas AI usage positively predicted self-esteem (B = 0.06, p = .009). This suggests that reliance on surface study strategies lowered self-esteem, while AI usage provided a small but positive contribution.

It shows that controlling for AI usage, each one-point increase in Surface Study scores was associated with a 0.12-point decrease in self-esteem scores. Conversely, holding surface study constant, each additional point in AI usage was linked to a 0.06-point increase in self-esteem scores.

To assess robustness, demographic characteristics (e.g., age, gender, state of residence, level of education, institution type, and academic discipline) and AI-related variables (duration and time since first use) were added as covariates in extended models. The inclusion of these factors increased explained variance by approximately 9-13%, with total R² values ranging from 12.3% to 23.7%. Academic discipline and institution type consistently accounted for about 5% of the additional variance. However, most demographic and AI-related predictors were nonsignificant, indicating limited unique influence. The central effects of study approaches and AI usage remained intact, underscoring their primary importance.

Taken together, regression analyses showed that AI usage was a robust predictor of procrastination, while study approaches had differentiated effects. The deep approach predicted higher self-esteem, whereas the surface approach predicted greater procrastination and lower self-esteem.

# References

Cohen, J. (1988). *Statistical Power Analysis for the Behavioral Sciences* (Second). Lawrence Erlbaum Associates. <https://www.utstat.toronto.edu/~brunner/oldclass/378f16/readings/CohenPower.pdf>

Cook, R. D. (1977). Detection of influential observation in linear regression. *Technometrics*, *19*(1), 15–18. <https://doi.org/10.1080/00401706.1977.10489493>

Field, A. (2017). *Discovering Statistics Using IBM SPSS Statistics* (5th ed.). SAGE. <http://repo.darmajaya.ac.id/5678/1/Discovering%20Statistics%20Using%20IBM%20SPSS%20Statistics%20%28%20PDFDrive%20%29.pdf>

Hair, J. F., Hult, G. T. M., Ringle, C. M., Sarstedt, M., Danks, N. P., & Ray, S. (2021). Mediation analysis. In *Classroom companion: business* (pp. 139–153). <https://doi.org/10.1007/978-3-030-80519-7_7>

Koirala, R. (2025). Guidelines for Simple Linear Regression Analysis in IBM SPSS: A Step-by-Step Approach. *International Research Journal of MMC*, *6*(1), 53–67. <https://doi.org/10.3126/irjmmc.v6i1.77479>

Osbourne, J. W., & Waters, E. (2002). Four assumptions of multiple regression that researchers should always test. *Practical Assessment, Research & Evaluation*, *8*(2), 2. <https://doi.org/10.7275/r222-hv23>
